# Supplementary material for: Enriching carbonylated proteins inside a microchip through the use of oxalyldihydrazide as a crosslinker
Source: Royal Society of Chemistry journal article supplement (doi:10.1039/c2lc40103g), 2012-01-01
Supplement: c2lc40103g.pdf [file c2lc40103g.pdf]

## **Electronic supplementary information to accompany the manuscript:**

### **Enriching Carbonylated Proteins inside a Microchip through the Use of Oxalyldihydrazide as a Crosslinker**

Bryant C. Hollins<sup>1</sup>, Steven A. Soper<sup>2</sup>, and June Feng<sup>1</sup>

<sup>1</sup>Louisiana Tech University, Ruston, LA, USA. Department of Biomedical Engineering.

<sup>2</sup>Louisiana State University, Baton Rouge, LA, USA. Departments of Chemistry and Mechanical Engineering

Email: junefeng@latech.edu

#### **Table of Content of the electronic supplemental information:**

p. 2 Figure S1. Demonstration of the hydrazide binding through the use of a fluorescent analogue

p. 3 Figure S2. AFM images of PMMA following subsequent surface modifications

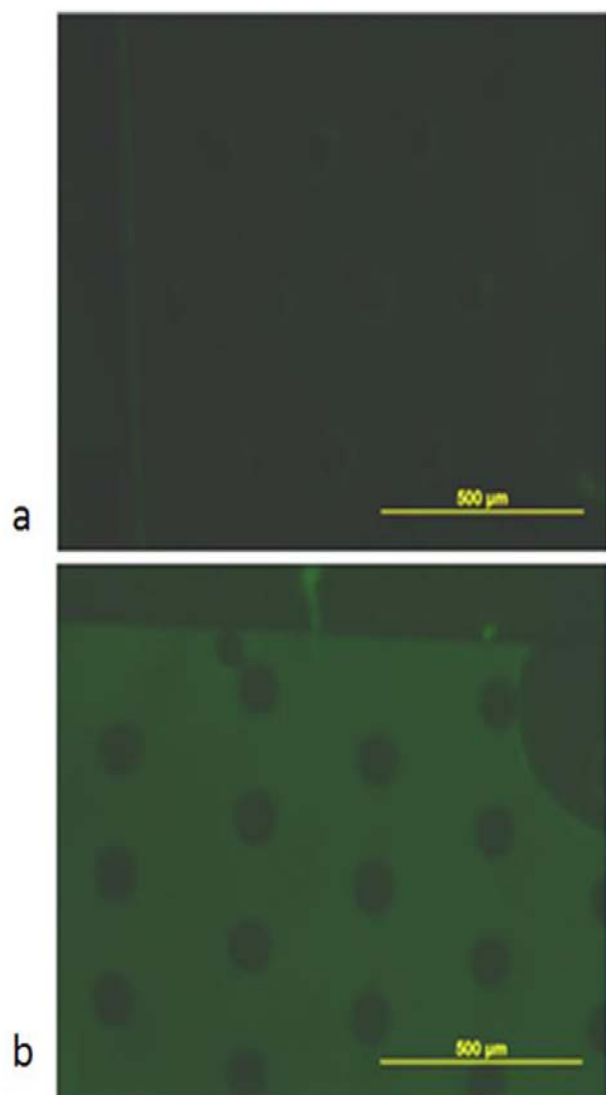

**Fig. S1** Fluorescence microscopy to confirm binding of oxalyldihydrazide analogue, Alexa 488 hydrazide. (a) An unmodified channel that was filled with Alexa 488 hydrazide. (b) A UV-modified channel filled with Alexa 488 hydrazide. The images were taken after the chemical incubated inside the channel overnight in the dark. Prior to the images being taken, the channel was rinsed with MES buffer. Scale bar = 500  $\mu\text{m}$ .

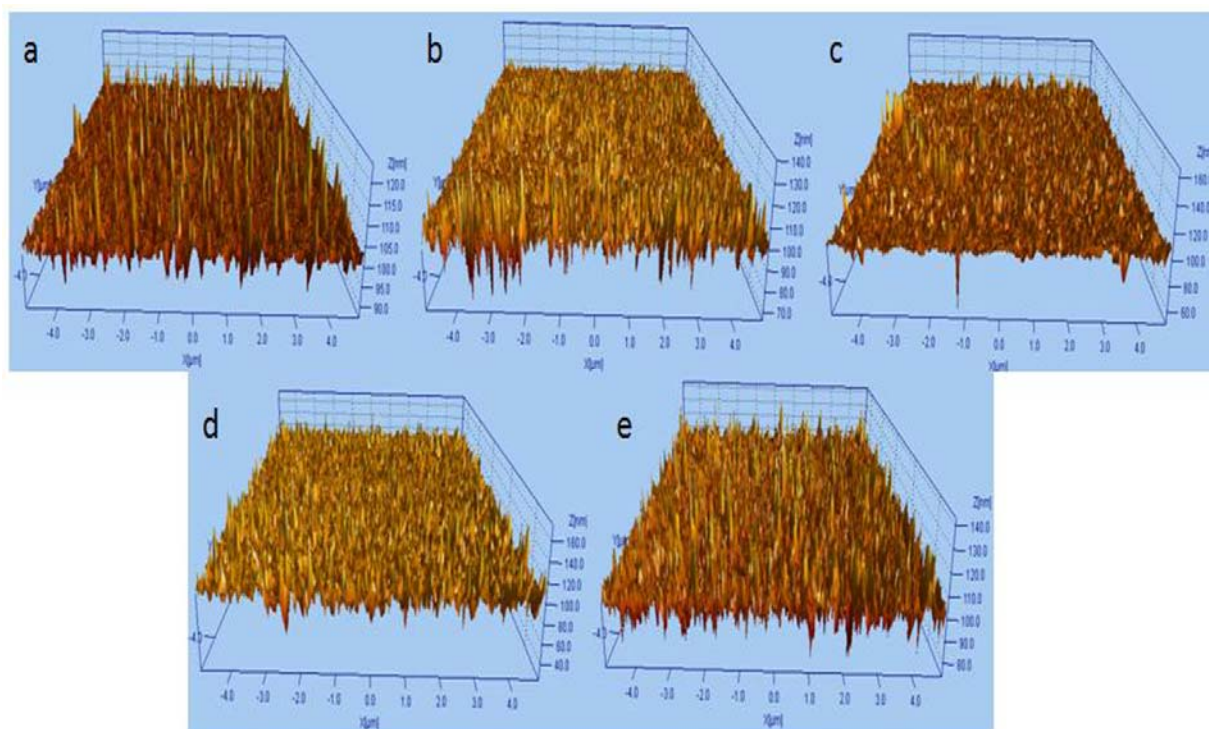

**Fig. S2.** AFM images from each stage of the surface modification. a) Native PMMA, b) UV-modified PMMA, c) Oxalyldihydrazide-immobilized PMMA, d) Oxidized-BSA-incubated PMMA, e) Native BSA-incubated PMMA.
